# Supplementary material
Source: publisher figshare collection journal article supplement (https://acs.figshare.com/ndownloader/files/5685714)
Supplement: Supplementary file 1 [file 5685714]

## **Supporting Information Cover Sheet**

**Author:** Jiankang Wang and James Farrell

**Title:** Investigating the Role of Atomic Hydrogen on Chloroethene Reactions with Iron using  
Tafel Analysis and Electrochemical Impedance Spectroscopy

**Total pages:** 2

**Total Figures:** 2

Figure S1

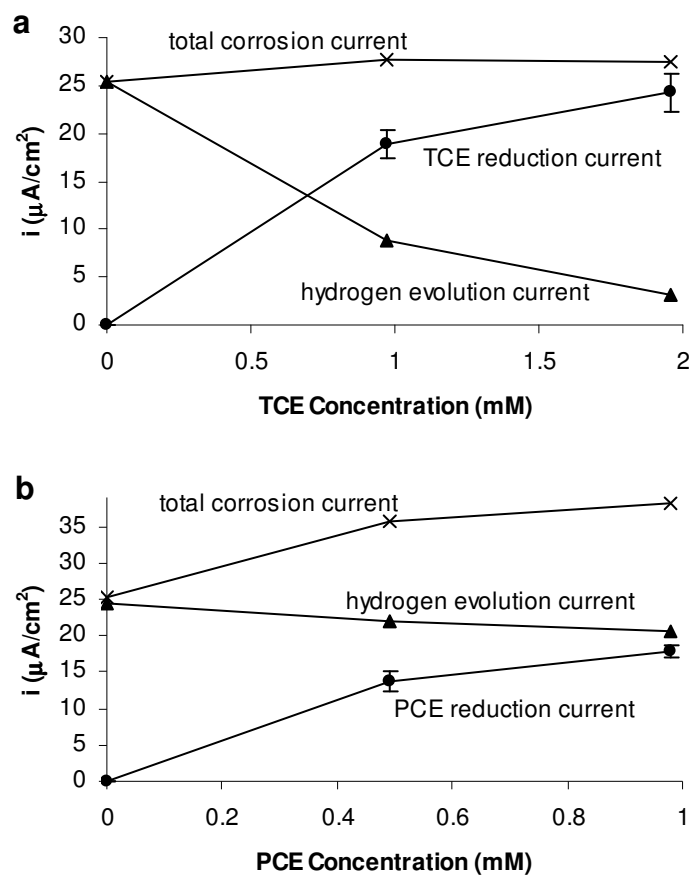

Figure S1. Corrosion current densities ( $i$ ) and current densities for hydrogen evolution, TCE (a) reduction, and PCE (b) reduction at a pH value of 3 in potassium sulfate electrolyte solutions. Error bars on the currents for TCE and PCE reduction represent 95% confidence intervals.

Figure S2

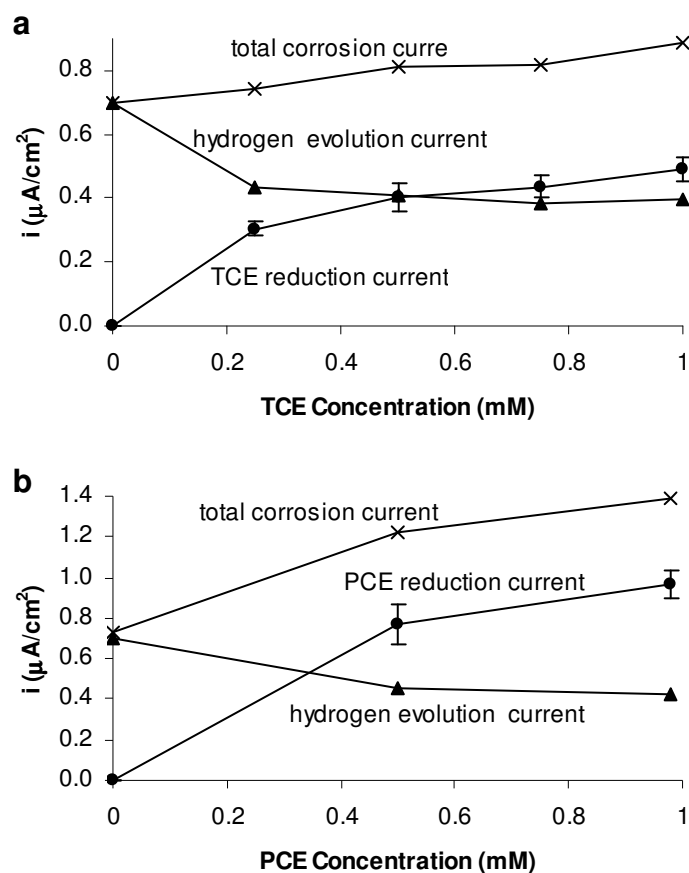

Figure S2. Corrosion current densities ( $i$ ) and current densities for hydrogen evolution, TCE (a) reduction, and PCE (b) reduction at a pH value of 7 in potassium phosphate electrolyte solutions. Error bars on the currents for TCE and PCE reduction represent 95% confidence intervals.
